# Supplementary material for: Supramolecular assembly of a 4-(1-naphthylvinyl)pyridine-appended Zn(ii) coordination compound for the turn-on fluorescence sensing of trivalent metal ions (Fe3+, Al3+, and Cr3+) and cell imaging application
Source: Royal Society of Chemistry journal article supplement (doi:10.1039/d0nj01608j), 2020-01-01
Supplement: d0nj01608j1.pdf [file d0nj01608j1.pdf]

## **Electronic Supplementary Information**

# Supramolecular assembly of a 4-(1-naphthylvinyl)pyridyl appended Zn(II) coordination compound for turn-on fluorescence sensing of trivalent metal ions ( $\text{Fe}^{3+}$ , $\text{Al}^{3+}$ , $\text{Cr}^{3+}$ ) and cell imaging application

Basudeb Dutta,<sup>a</sup> Sunanda Dey,<sup>b</sup> Kunal Pal,<sup>c,d</sup> Sambhunath Bera,<sup>a</sup> Sanobar Naaz,<sup>a</sup> Kuladip Jana,<sup>d</sup> Chittaranjan Sinha\*<sup>b</sup> and Mohammad Hedayetullah Mir\*<sup>a</sup>

<sup>a</sup>Department of Chemistry, Aliah University, New Town, Kolkata 700 156, India.

<sup>b</sup>Department of Chemistry, Jadavpur University, Jadavpur, Kolkata 700 032, India.

<sup>c</sup>Department of Life Science and Biotechnology, Jadavpur University, Kolkata 700032, India

<sup>d</sup>Division of Molecular Medicine and Centre for Translational Research, Bose Institute, Kolkata 700056, India.

To whom correspondence should be addressed. E-mail: [crsjuchem@gmail.com](mailto:crsjuchem@gmail.com),  
[chmmir@gmail.com](mailto:chmmir@gmail.com)

**Table S1.** Crystal data and refinement parameters for compound **1**

|                                                                             |                                                                   |
|-----------------------------------------------------------------------------|-------------------------------------------------------------------|
| Formula                                                                     | C <sub>36</sub> H <sub>26</sub> N <sub>4</sub> S <sub>2</sub> Zn  |
| fw                                                                          | 644.10                                                            |
| Crystalsyst                                                                 | Monoclinic                                                        |
| Space group                                                                 | <i>C2/c</i>                                                       |
| <i>a</i> (Å)                                                                | 33.760(4)                                                         |
| <i>b</i> (Å)                                                                | 6.1009(6)                                                         |
| <i>c</i> (Å)                                                                | 17.523(2)                                                         |
| $\alpha$ (deg)                                                              | 90                                                                |
| $\beta$ (deg)                                                               | 118.990(4)                                                        |
| $\gamma$ (deg)                                                              | 90                                                                |
| <i>V</i> (Å <sup>3</sup> )                                                  | 3156.9(6)                                                         |
| <i>Z</i>                                                                    | 4                                                                 |
| <i>D</i> <sub>calcd</sub> (g/cm <sup>3</sup> )                              | 1.355                                                             |
| $\mu$ (mm <sup>-1</sup> )                                                   | 0.942                                                             |
| F(000)                                                                      | 1328.0                                                            |
| Crystal Size [mm]                                                           | 0.12 × 0.11 × 0.10                                                |
| Temperature (K)                                                             | 273(2)                                                            |
| $\lambda$ (Å)                                                               | 0.71073                                                           |
| Data [ <i>I</i> > 2 $\sigma$ ( <i>I</i> )]/params                           | 2257/ 195                                                         |
| GOF on <i>F</i> <sup>2</sup>                                                | 1.040                                                             |
| final <i>R</i> indices ( <i>I</i> > 2 $\sigma$ ( <i>I</i> )) <sup>a,b</sup> | <i>R</i> <sub>1</sub> = 0.0333<br><i>wR</i> <sub>2</sub> = 0.0860 |

$$^a R_1 = \sum ||F_o| - |F_c|| / \sum |F_o|, \quad ^b wR_2 = [\sum w(F_o^2 - F_c^2)^2 / \sum w(F_o^2)^2]^{1/2}$$

**Table S2.** Selected bond lengths and bond angles in **1**.

|                    |            |                 |            |
|--------------------|------------|-----------------|------------|
| Zn01 - N1          | 2.0278(19) | N2-Zn01-N1-C1   | 22.1(2)    |
| Zn01 - N2          | 1.915(2)   | N1_a-Zn01-N1-C5 | 76.6(2)    |
| Zn01 - N1_a        | 2.0278(19) | Zn01-N1-C1-C2   | 168.41(19) |
| Zn01 - N2_a        | 1.915(2)   | N2_a-Zn01-N1-C1 | 155.0(2)   |
| N1 - Zn01 - N2     | 107.73(9)  | Zn01-N1-C5-H5   | 11         |
| N2 - Zn01 - N1_a   | 107.73(9)  | S1 - C18- N2    | 178.2(3)   |
| Zn01 - N1 - C1     | 123.31(15) | N1 - C5 - C4    | 123.6(2)   |
| Zn01 - N2 - C18    | 174.5(2)   | N1-C1-H1        | 118.3      |
| N1 - Zn01 - N1_a   | 98.38(8)   | N1-C5-H5        | 118.2      |
| N2 - Zn01 - N2_a   | 120.41(14) | N1 - C5- C4     | 118.9(2)   |
| Zn01 - N1 - C5     | 119.23(16) | C13 - C12-C17   | 88.16(10)  |
| N1 - Zn01 - N2_a   | 110.27(9)  | C7- C8 - C13    | 121.2(2)   |
| N1_a - Zn01 - N2_a | 107.73(9)  | C11- C12 - C17  | 121.6(3)   |

Symmetry Code: a = 1-x, y, 3/2-z

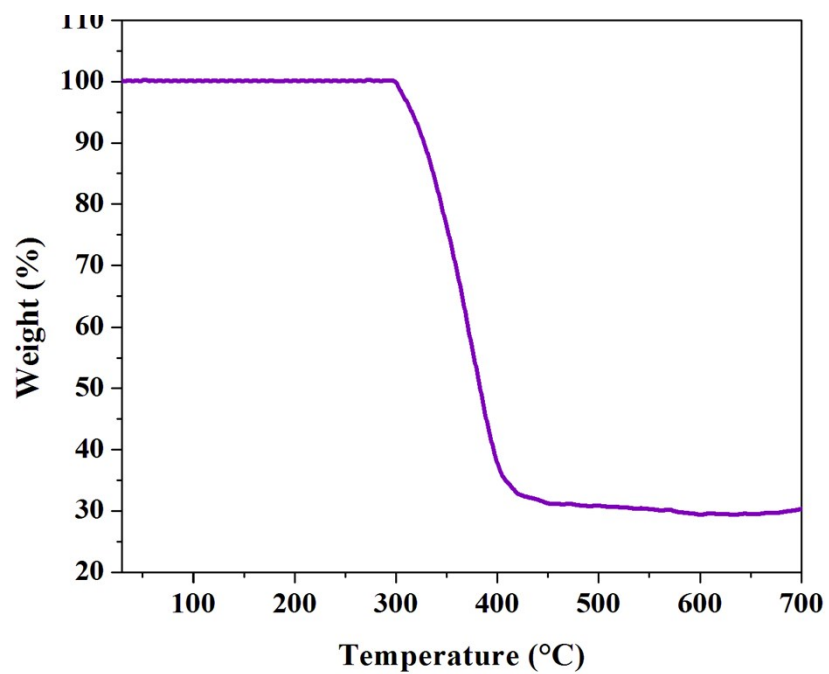

**Fig. S1** TGA plot of 1.

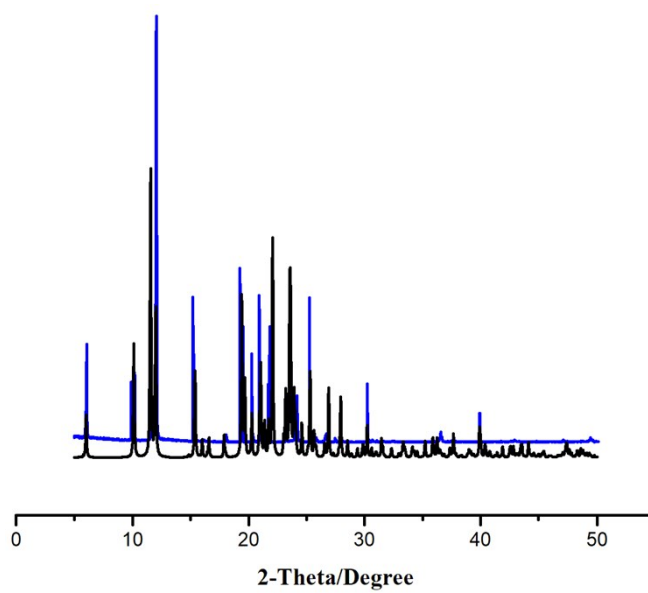

**Fig. S2** Powder X-ray diffraction patterns of simulated 1 (black), as-synthesized 1 (blue).

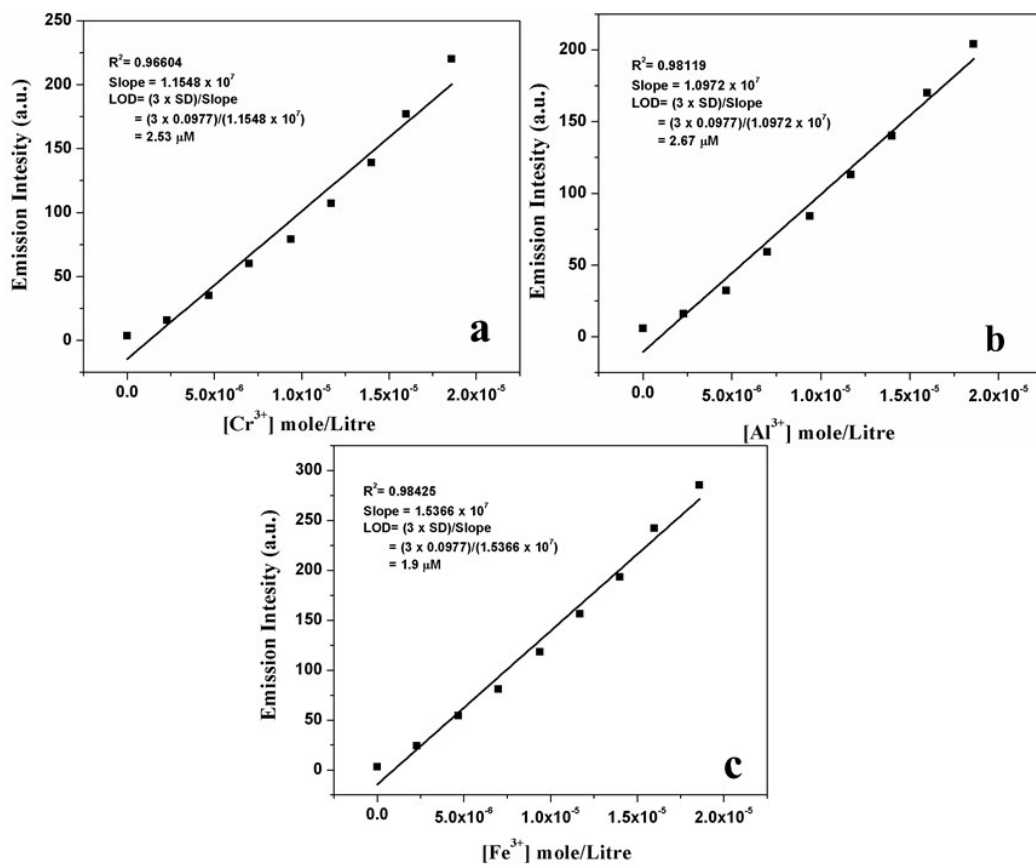

**Fig. S3** Calculation of limit of detection (LOD) for  $\text{M}^{3+}$  ions (a)  $\text{Cr}^{3+}$  (b)  $\text{Al}^{3+}$  and (c)  $\text{Fe}^{3+}$ .

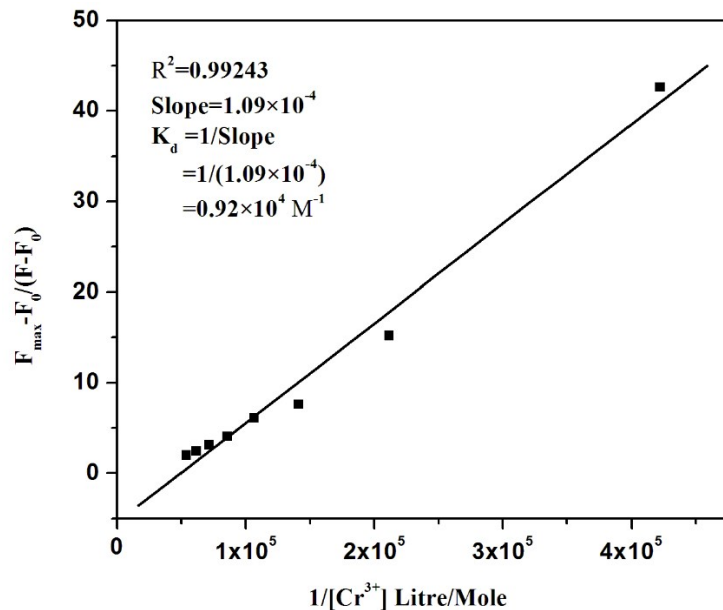

**Fig. S4** Benesi–Hildebrand plot for determining the binding constant ( $K_d$ ) of **1** with  $\text{Cr}^{3+}$ .

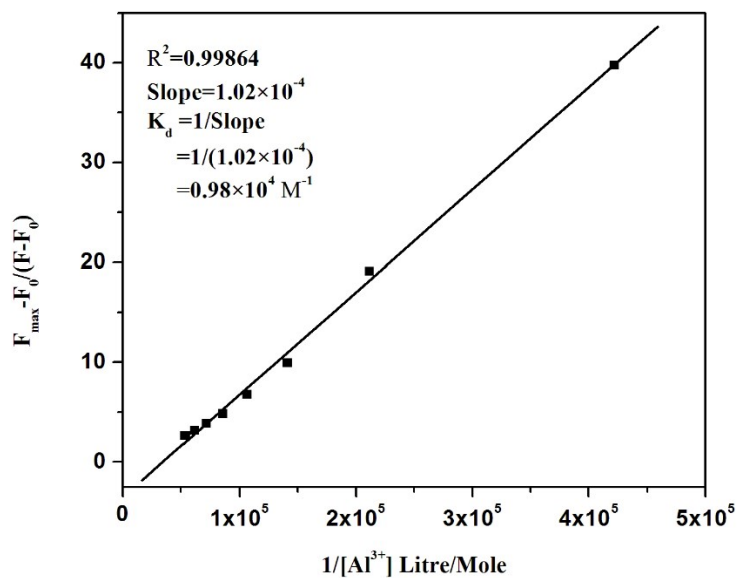

**Fig. S5** Benesi–Hildebrand plot for determining the binding constant ( $K_d$ ) of **1** with  $\text{Al}^{3+}$ .

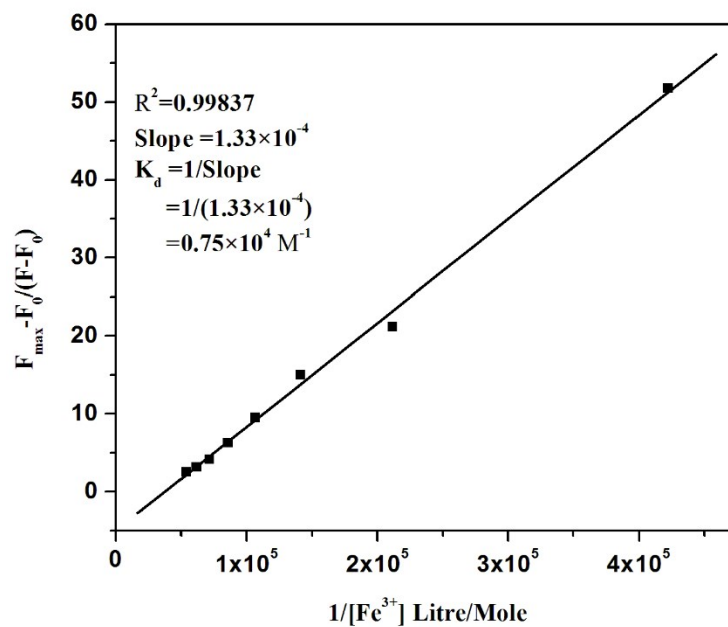

**Fig. S6** Benesi–Hildebrand plot for determining the binding constant ( $K_d$ ) of **1** with  $\text{Fe}^{3+}$ .

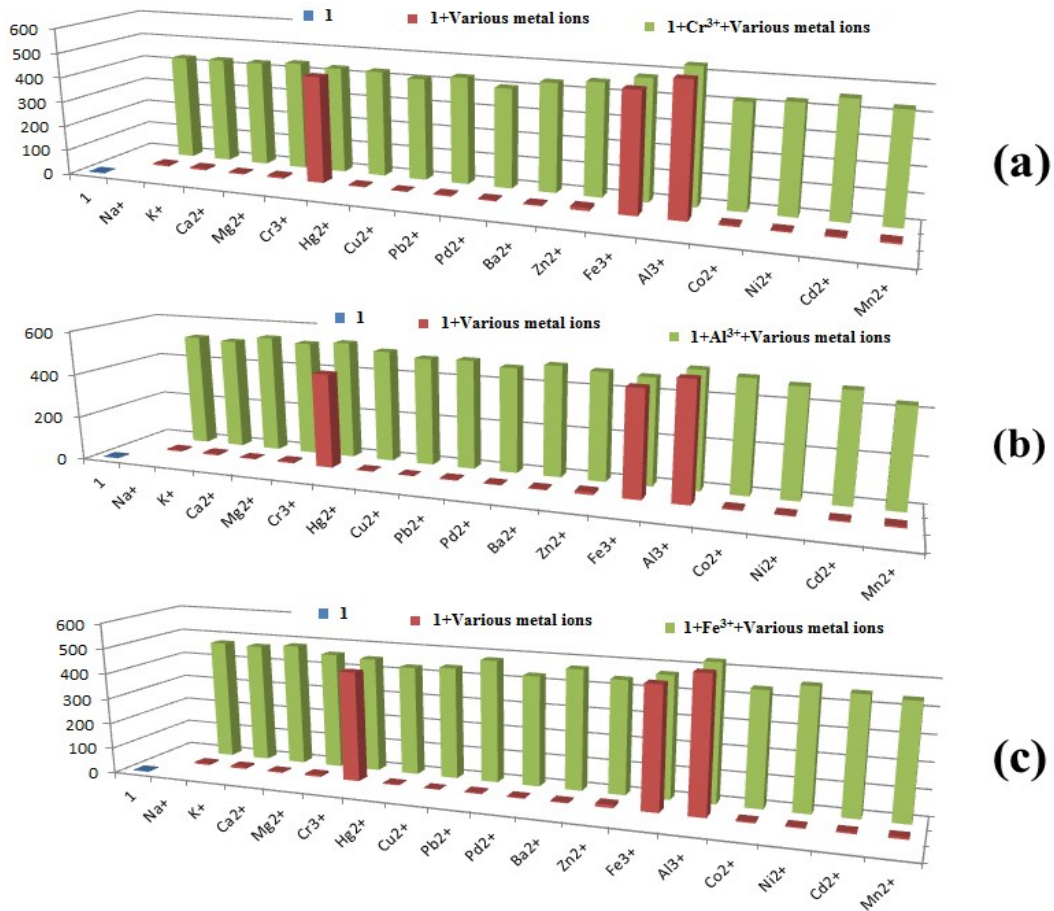

**Fig. S7** Interference studies by various metal ions on  $M^{3+}$  sensitivity (a)  $Cr^{3+}$ , (b)  $Al^{3+}$  and (c)  $Fe^{3+}$ .



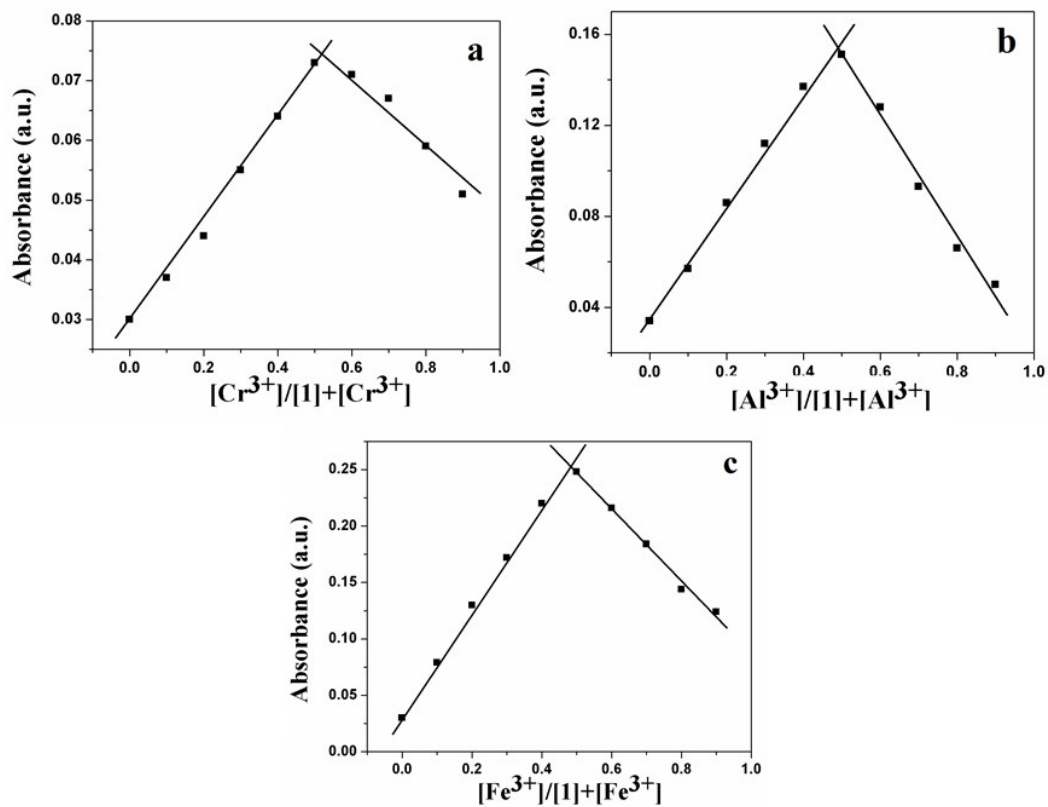

**Fig. S8** Job's plots for the determination of binding stoichiometry of **1** with selective metal ions

(a) Cr<sup>3+</sup>, (b) Al<sup>3+</sup> and (c) Fe<sup>3+</sup>.

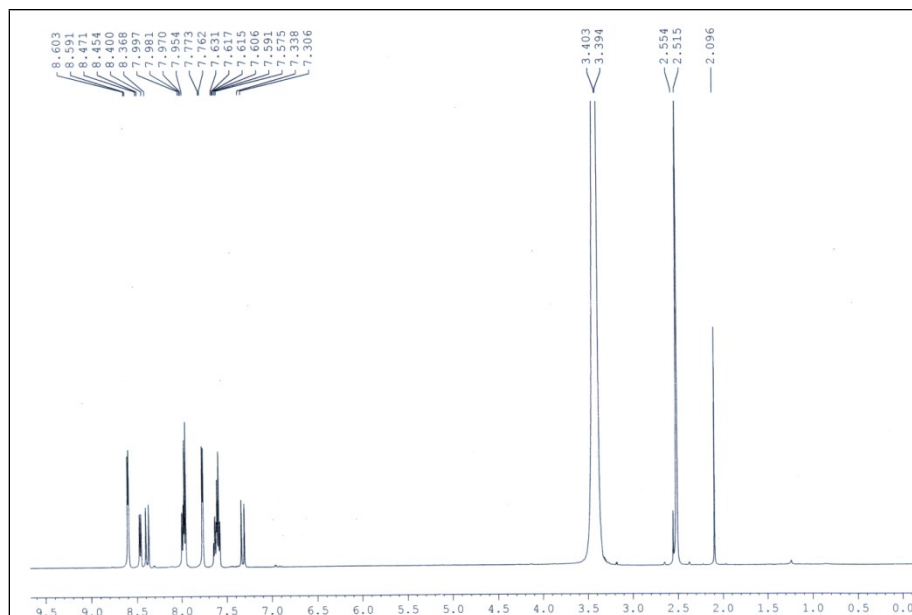

**Fig. S9**  $^1\text{H}$  NMR spectrum of compound **1** in  $\text{DMSO-d}_6$ .

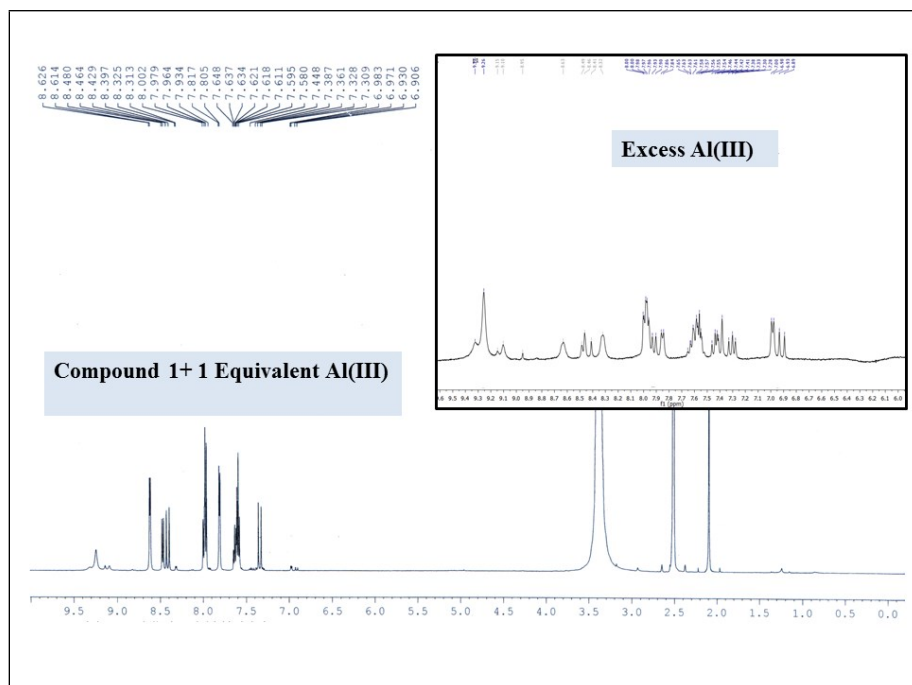

**Fig. S10**  $^1\text{H}$  NMR spectra (in  $\text{DMSO-d}_6$ ) of compound **1** with  $\text{Al}^{3+}$  and partial spectra (inset) of compound **1** with excess  $\text{Al}^{3+}$  (in  $\text{DMSO-d}_6$ ).

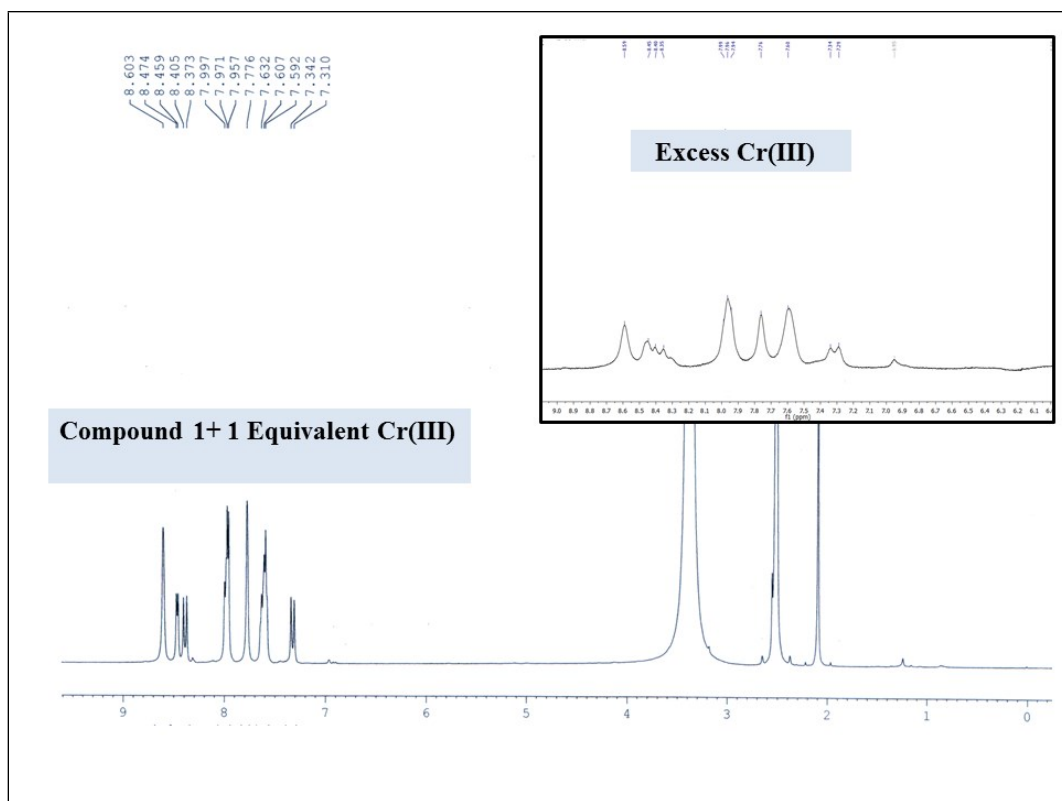

**Fig. S11** <sup>1</sup>H NMR spectrum (in DMSO-d<sub>6</sub>) of compound **1** with Cr<sup>3+</sup> and partial spectra (inset) of compound **1** with excess Cr<sup>3+</sup> (in DMSO-d<sub>6</sub>).

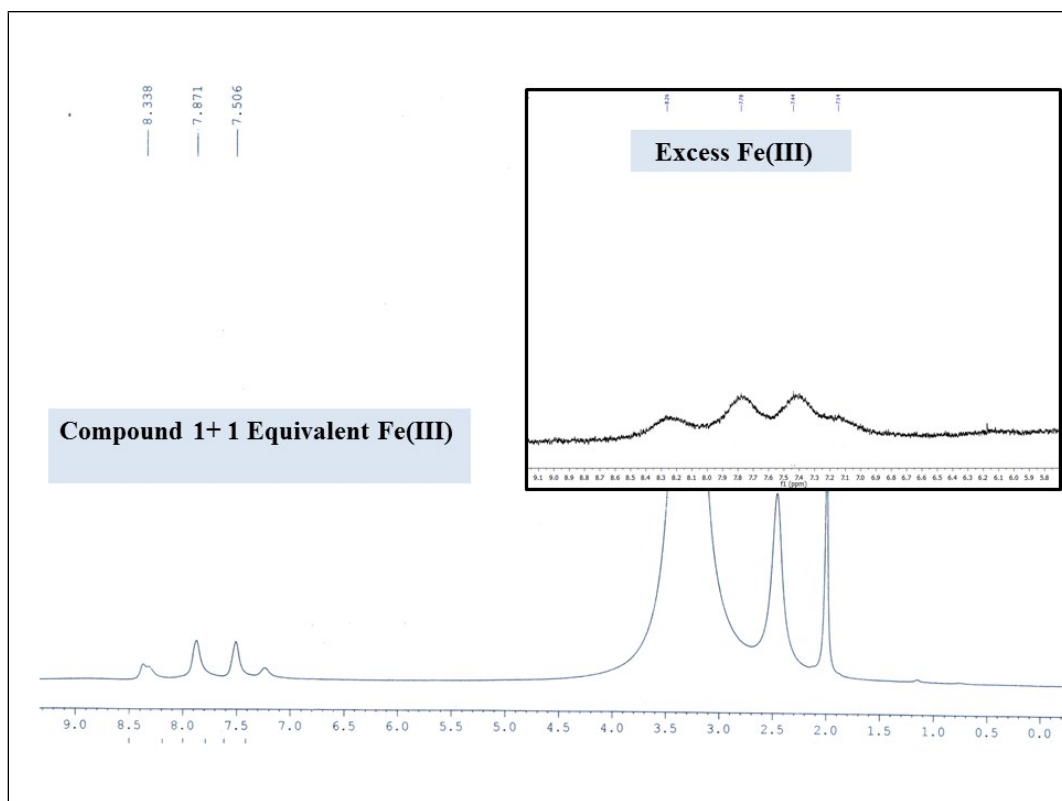

**Fig. S12** <sup>1</sup>H NMR spectra (in DMSO-d<sub>6</sub>) of compound **1** with Fe<sup>3+</sup> and partial spectra (inset) of compound **1** with excess Fe<sup>3+</sup> (in DMSO-d<sub>6</sub>).

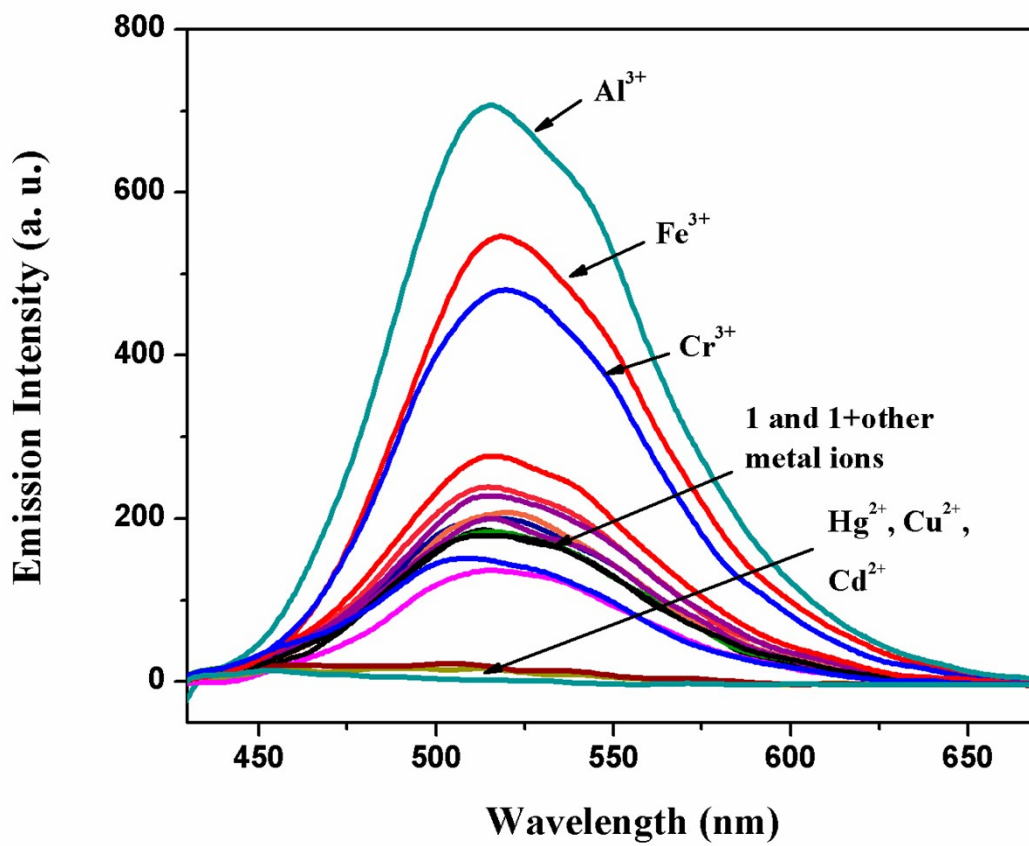

**Fig. S13** Change in emission spectrum of **1** (20  $\mu\text{M}$ ) with addition of different metal ions (60  $\mu\text{M}$  each) in acetone,  $\lambda_{\text{ex}}$ , 400 nm.

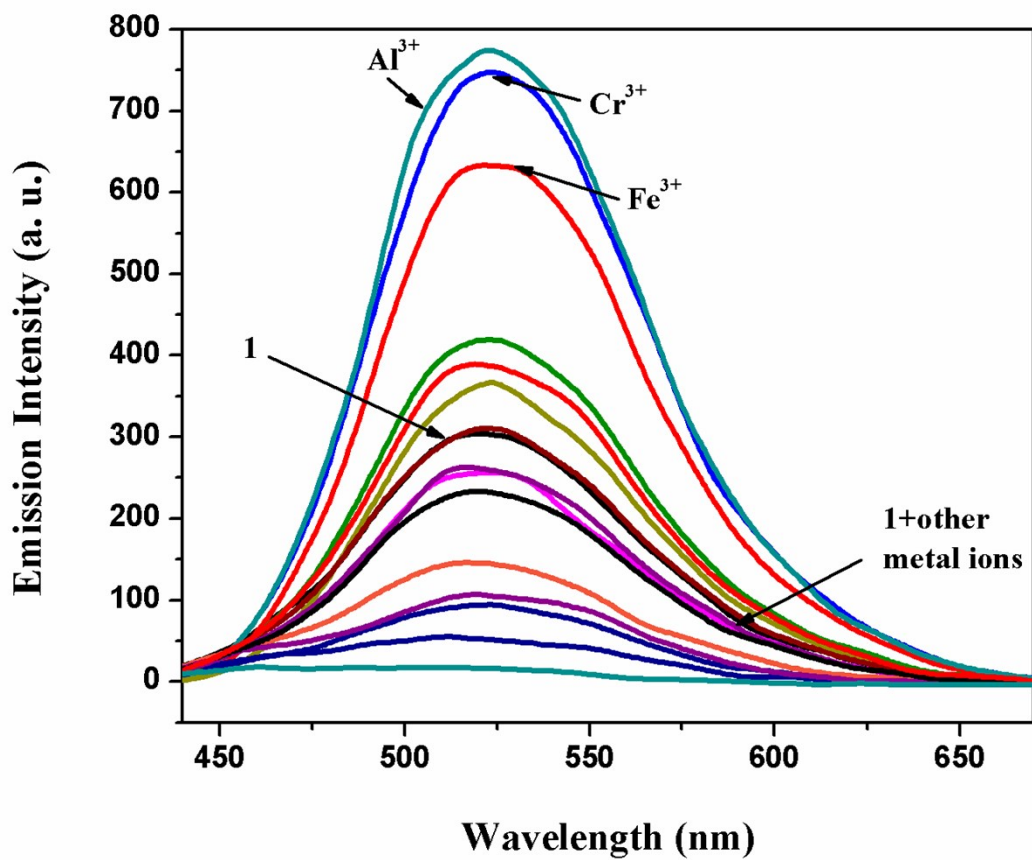

**Fig. S14** Change in emission spectrum of **1** (20  $\mu\text{M}$ ) with addition of different metal ions (60  $\mu\text{M}$  each) in acetonitrile,  $\lambda_{\text{ex}}$ , 400 nm.

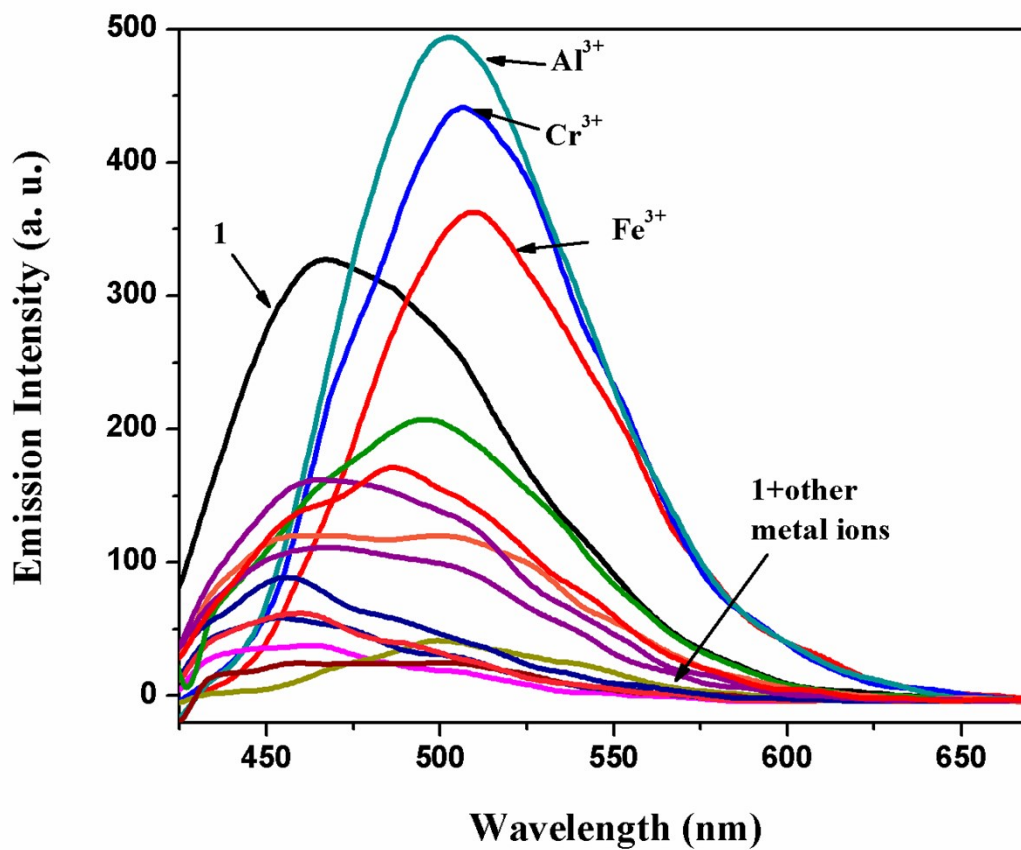

**Fig. S15** Change in emission spectrum of **1** (20  $\mu\text{M}$ ) with addition of different metal ions (60  $\mu\text{M}$  each) in dichloromethane,  $\lambda_{\text{ex}}$ , 400 nm.

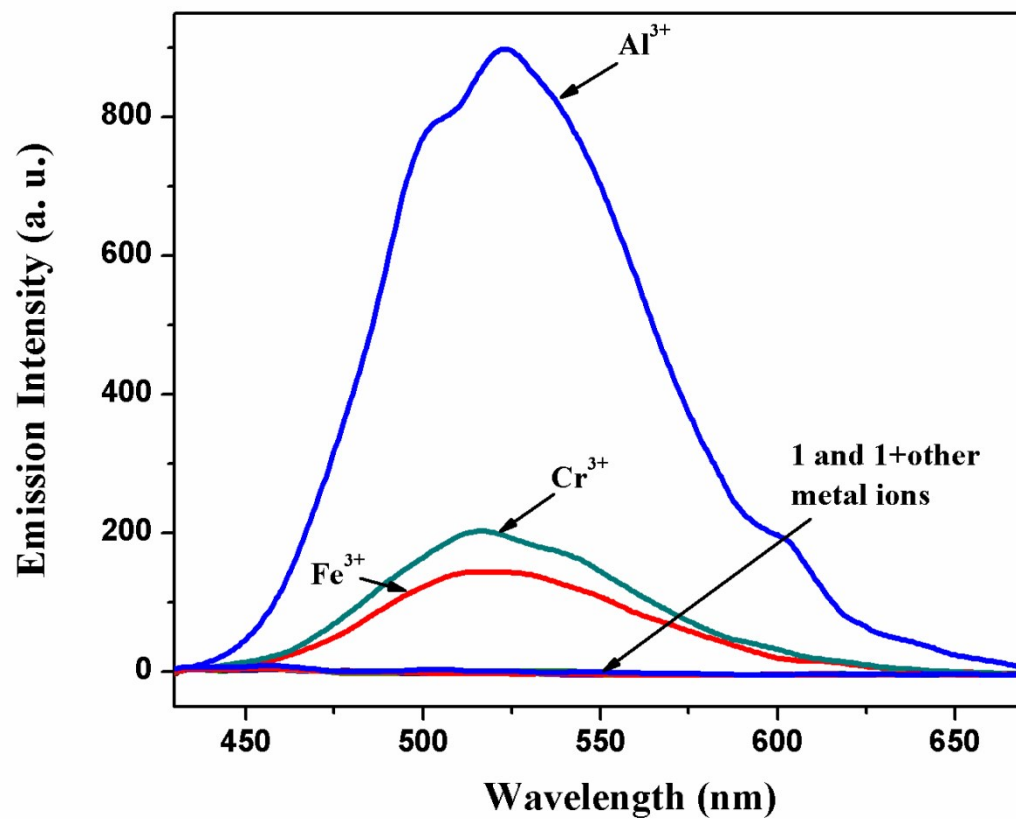

**Fig. S16** Change in emission spectrum of **1** (20  $\mu\text{M}$ ) with addition of different metal ions (60  $\mu\text{M}$  each) in DMF,  $\lambda_{\text{ex}}$ , 400 nm.



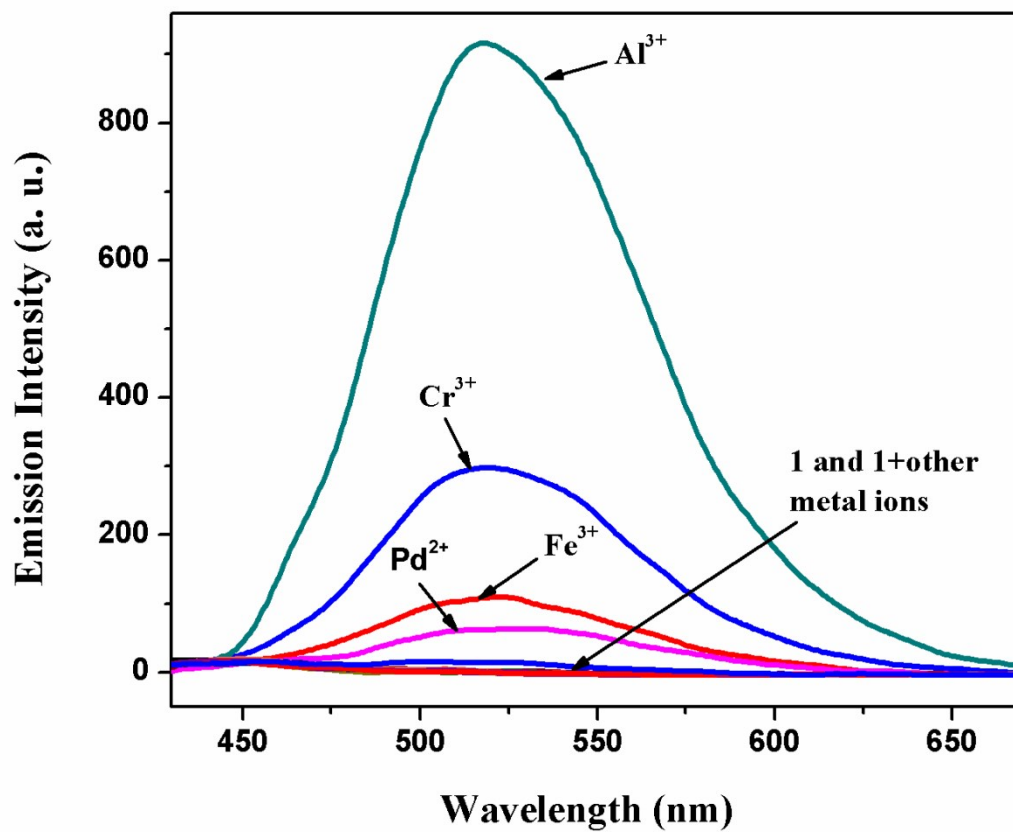

**Fig. S17** Change in emission spectrum of **1** (20 μM) with addition of different metal ions (60 μM each) in DMSO,  $\lambda_{\text{ex}}$ , 400 nm.

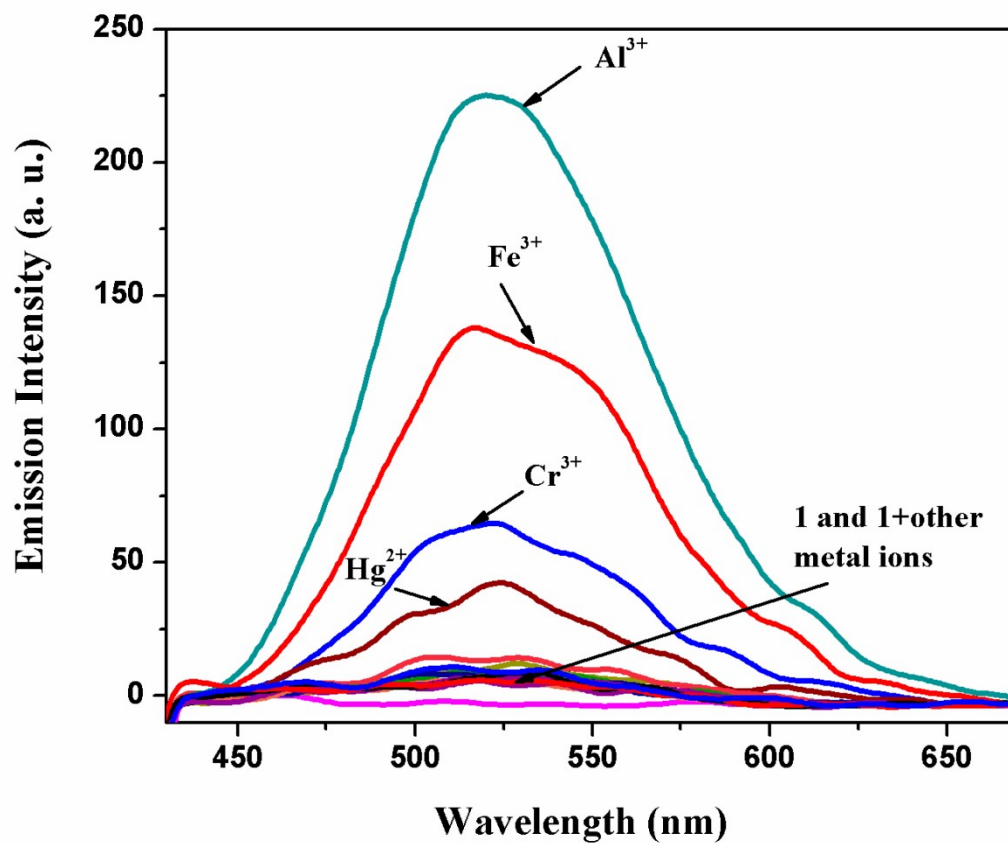

**Fig. S18** Change in emission spectrum of **1** (20  $\mu\text{M}$ ) with addition of different metal ions (60  $\mu\text{M}$  each) in water,  $\lambda_{\text{ex}}$ , 400 nm.

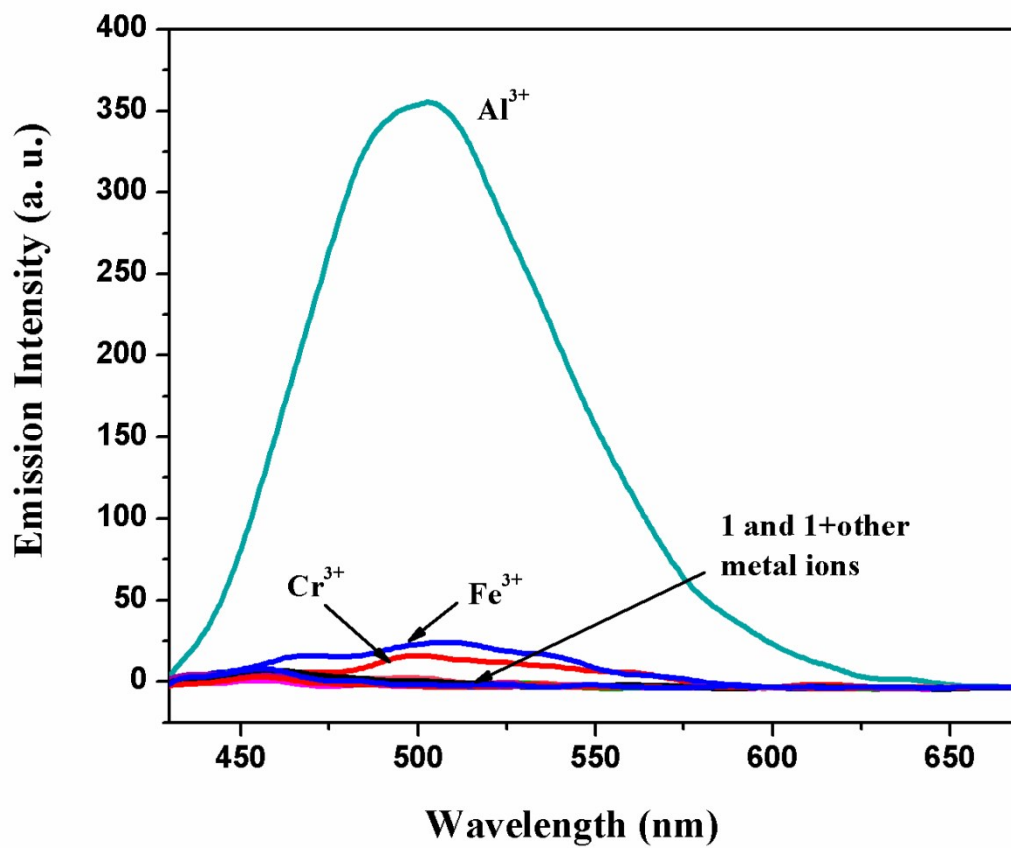

**Fig. S19** Change in emission spectrum of **1** (20 μM) with addition of different metal ions (60 μM each) in THF,  $\lambda_{\text{ex}}$ , 400 nm.

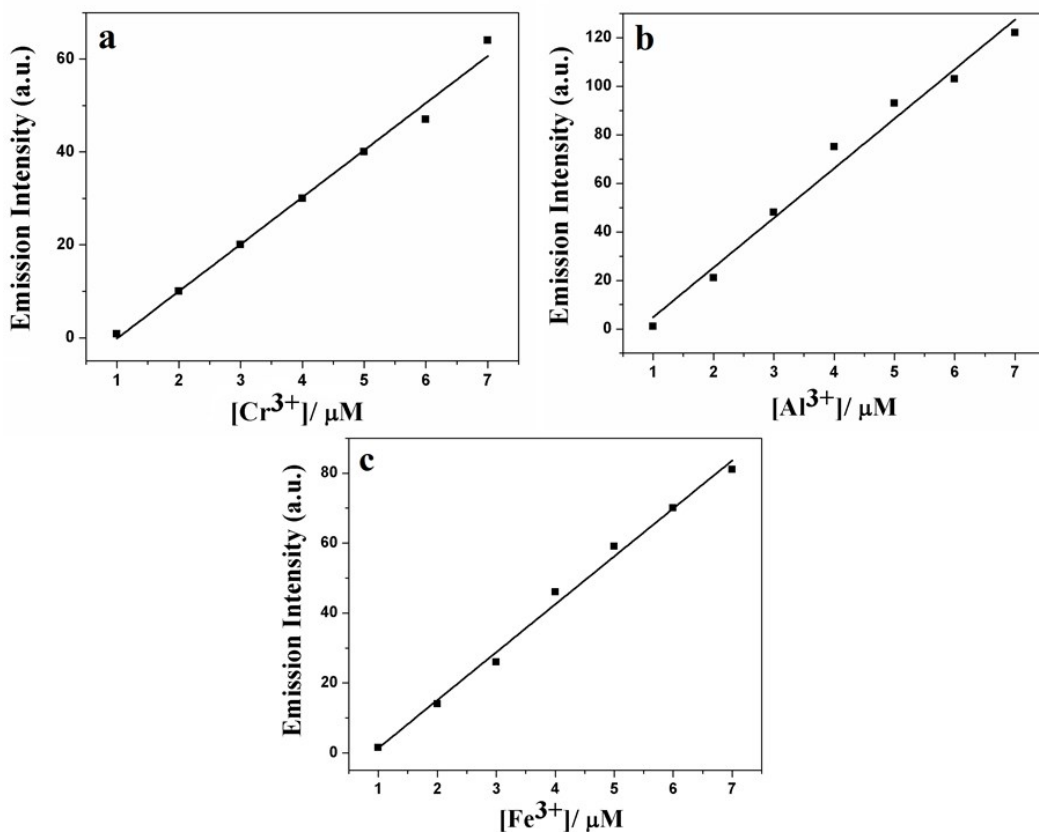

**Fig. S20** Calibration plot for ion recovery (a) Cr<sup>3+</sup>, (b) Al<sup>3+</sup> and (c) Fe<sup>3+</sup>.

**Table S3.** Comparison of some parameters of some recently published related research works

| Entry | Sensor Molecule                                                                     | Fluorescence Enhancement (fold)                                            | Concerned Cations                                         | LOD                                                                                         | Cell Imaging | Reference |
|-------|-------------------------------------------------------------------------------------|----------------------------------------------------------------------------|-----------------------------------------------------------|---------------------------------------------------------------------------------------------|--------------|-----------|
| 1     | 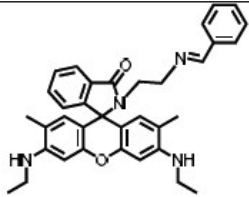 | –                                                                          | Fe <sup>3+</sup>                                          | –                                                                                           | Yes          | 1         |
| 2     |  | 98 (Al <sup>3+</sup> )<br>50 (Cr <sup>3+</sup> )<br>38 (Fe <sup>3+</sup> ) | Al <sup>3+</sup> , Cr <sup>3+</sup> ,<br>Fe <sup>3+</sup> | 1.18 nM (Al <sup>3+</sup> ),<br>1.80 nM (Cr <sup>3+</sup> ),<br>4.04 nM (Fe <sup>3+</sup> ) | No           | 2         |

|   |                                                                                     |                                                                                 |                                                           |                                                                                               |     |           |
|---|-------------------------------------------------------------------------------------|---------------------------------------------------------------------------------|-----------------------------------------------------------|-----------------------------------------------------------------------------------------------|-----|-----------|
| 3 | 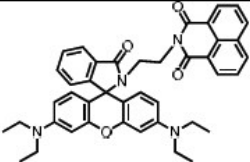   | 62 (Al <sup>3+</sup> )<br>1.7 (Cr <sup>3+</sup> )<br>1.47 (Fe <sup>3+</sup> )   | Al <sup>3+</sup> , Cr <sup>3+</sup> ,<br>Fe <sup>3+</sup> | 1.74 nM (Al <sup>3+</sup> ),<br>2.36 μM (Cr <sup>3+</sup> ),<br>2.90 μM (Fe <sup>3+</sup> )   | No  | 3         |
| 4 |    | 31 (Al <sup>3+</sup> )<br>26 (Cr <sup>3+</sup> )<br>41 (Fe <sup>3+</sup> )      | Al <sup>3+</sup> , Cr <sup>3+</sup> ,<br>Fe <sup>3+</sup> | 1.34 μM (Al <sup>3+</sup> ),<br>2.28 μM (Cr <sup>3+</sup> ),<br>1.28 μM (Fe <sup>3+</sup> )   | Yes | 4         |
| 5 |    | 1465 (Al <sup>3+</sup> )<br>588 (Cr <sup>3+</sup> )<br>800 (Fe <sup>3+</sup> )  | Al <sup>3+</sup> , Cr <sup>3+</sup> ,<br>Fe <sup>3+</sup> | 6.97 nM (Al <sup>3+</sup> ),<br>15.80 nM (Cr <sup>3+</sup> ),<br>14.00 nM (Fe <sup>3+</sup> ) | Yes | 5         |
| 6 |    | 14 (Al <sup>3+</sup> )<br>10 (Cr <sup>3+</sup> )<br>21 (Fe <sup>3+</sup> )      | Al <sup>3+</sup> , Cr <sup>3+</sup> ,<br>Fe <sup>3+</sup> | 0.34 μM (Al <sup>3+</sup> ),<br>0.31 μM (Cr <sup>3+</sup> ),<br>0.29 μM (Fe <sup>3+</sup> )   | Yes | 6         |
| 7 |   | 630                                                                             | Al <sup>3+</sup>                                          | 2.8 nM                                                                                        | Yes | 7         |
| 8 |  | 117 (Fe <sup>3+</sup> ),<br>130 (Al <sup>3+</sup> ),<br>107 (Cr <sup>3+</sup> ) | Al <sup>3+</sup> , Cr <sup>3+</sup> ,<br>Fe <sup>3+</sup> | 2.53 μM (Cr <sup>3+</sup> ),<br>2.67 μM (Al <sup>3+</sup> ),<br>1.9 μM (Fe <sup>3+</sup> )    | Yes | This work |

### Reference:

1. M. H. Lee, H. Lee, M. J. Chang, H. S. Kim, C. Kang and J. S. Kim, *Dyes Pigm.*, **2016**, *130*, 245.
2. S. Dey, S. Sarkar, D. Maity and P. Roy, *Sens. Actuators, B*, **2017**, *246*, 518.
3. S. Paul, A. Manna and S. Goswami, *Dalton Trans.*, **2015**, *44*, 11805.
4. D. Das, R. Alam, A. Katarkar and M. Ali, *Photochem. Photobiol. Sci.*, **2019**, *18*, 242.

5. A. Roy, S. Das, S. Sacher, S. K. Mandal and P. Roy, *Dalton Trans.*, **2019**, 48, 17594.
6. R. Alam, R. Bhowmick, A. S. M. Islam, A. Katarkar, K. Chaudhuri and M. Ali, *New J. Chem.*, **2017**, 41, 8359.
7. A. Roy, R. Mukherjee, B. Dam, S. Dam and P. Roy, *New J. Chem.*, **2018**, 42, 8415.
